# Supplementary material for: Anemia Is an Indicator for Worse Organ Damage Trajectories in Patients with Systemic Sclerosis: A Retrospective Study
Source: MDPI journal article supplement (doi:10.3390/jcm11175013), 2022-08-26
Supplement: s1 [file s1]

**Supplementary files:**

**Table S1. Frequency of SCTC-DI items in different SSc cohorts**

| Items                                                                   | PKUTH and PKUPH-SSc<br>N = 433 | ASCS<br>N = 1568 | <i>p</i> value | CSRG<br>N = 1624 | <i>p</i> value |
|-------------------------------------------------------------------------|--------------------------------|------------------|----------------|------------------|----------------|
| <b>Musculoskeletal and skin</b>                                         |                                |                  |                |                  |                |
| Joint contracture (small joints)                                        | 56 (12.9%)                     | 827 (52.7%)      | < 0.001        | 584 (36.0%)      | < 0.001        |
| Joint contracture (large joints)                                        | 7 (1.6%)                       | 536 (34.2%)      | < 0.001        | 305 (18.8%)      | < 0.001        |
| Sicca symptoms                                                          | 160 (37.0%)                    | 806 (51.4%)      | < 0.001        | 785 (48.3%)      | < 0.001        |
| Proximal muscle weakness                                                | 32 (7.4%)                      | 72 (4.6%)        | 0.020          | 236 (14.5%)      | < 0.001        |
| Calcinosis complicated by infection or requiring surgery                | 7 (1.6%)                       | 46 (3.0%)        | 0.131          | -                | -              |
| <b>Vascular</b>                                                         |                                |                  |                |                  |                |
| Digital ulceration                                                      | 87 (20.1%)                     | 440 (28.1%)      | 0.001          | 164 (16.3%)      | < 0.001        |
| Digital amputation required                                             | 19 (4.4%)                      | 149 (9.5%)       | 0.001          | 134 (8.3%)       | 0.006          |
| <b>Gastrointestinal</b>                                                 |                                |                  |                |                  |                |
| Esophageal dysmotility                                                  | 69 (15.9%)                     | 143 (9.1%)       | < 0.001        | 1160 (71.4%)     | < 0.001        |
| Esophageal stricture                                                    | 2 (0.5%)                       | 171 (10.9%)      | < 0.001        | 218 (13.4%)      | < 0.001        |
| Refractory gastro-esophageal reflux disease (heartburn)                 | 103 (23.8%)                    | 747 (47.6%)      | < 0.001        | 1029 (63.4%)     | < 0.001        |
| GAVE                                                                    | 0 (0.0%)                       | 115 (7.3%)       | -              | -                | -              |
| Pseudo-obstruction                                                      | 6 (1.4%)                       | 45 (2.9%)        | 0.083          | 146 (9.0%)       | < 0.001        |
| BMI < 18.5 kg/m <sup>2</sup> or weight loss > 10% in the last 12 months | 155 (35.8%)                    | 801 (51.1%)      | < 0.001        | 361 (22.2%)      | < 0.001        |
| <b>Respiratory</b>                                                      |                                |                  |                |                  |                |
| ILD > 20% extent on HRCT                                                | 172 (39.7%)                    | 141 (9.0%)       | < 0.001        | 365 (22.5%)      | < 0.001        |
| FVC < 70%                                                               | 52 (12.0%)                     | 60 (3.8%)        | < 0.001        | 39 (7.1%)        | < 0.001        |
| Dependence on home oxygen                                               | 9 (2.1%)                       | 59 (3.8%)        | 0.087          | 117 (7.2%)       | < 0.001        |
| <b>Cardiovascular</b>                                                   |                                |                  |                |                  |                |
| PAH                                                                     | 42 (9.7%)                      | 249 (15.9%)      | 0.001          | 125 (7.7%)       | 0.175          |
| Moderate to severe right ventricular dysfunction                        | 10 (2.3%)                      | 264 (16.8%)      | < 0.001        | -                | -              |
| Myocardial disease                                                      | 22 (5.1%)                      | 107 (6.8%)       | 0.191          | 81 (5.0%)        | 0.937          |
| Moderate to large pericardial effusion                                  | 13 (3.0%)                      | -                | -              | 45 (2.8%)        | 0.796          |
| <b>Renal</b>                                                            |                                |                  |                |                  |                |
| History of SRC                                                          | 5 (1.2%)                       | 39 (2.5%)        | 0.094          | 77 (4.7%)        | 0.001          |
| eGFR < 45 ml/min/1.73m <sup>2</sup>                                     | 4 (0.9%)                       | 7 (0.5%)         | 0.411          | 34 (2.1%)        | 0.160          |
| CKD stage 5 and need for renal replacement therapy                      | 1 (0.2%)                       | 4 (0.3%)         | 1.000          | 33 (2.0%)        | 0.016          |

Abbreviations: SCTC-DI, Scleroderma Clinical Trials Consortium Damage Index; SSc: systemic sclerosis; PKUTH-SSc, Peking University Third Hospital SSc cohort; PKUPH-SSc, Peking University People's Hospital SSc cohort; ASCS, Australian Scleroderma Cohort Study cohort; CSRG, Canadian Scleroderma Research Group cohort; GAVE, Gastric antral vascular ectasia; BMI, body mass index; ILD, interstitial lung disease; HRCT, HRCT, high-resolution CT; FVC, Forced Vital Capacity; PAH, pulmonary arterial hypertension; SRC, scleroderma renal crisis; eGFR, Estimated Glomerular Filtration Rate; CKD, chronic kidney disease.

Note: *p* value represents the frequency differences compared between ASCS cohort and our cohort, CSRG cohort and our cohort, respectively;

Data of ASCS and CSRG cohorts were adapted from “Development and validation of the Scleroderma Clinical Trials Consortium Damage Index (SCTC-DI): a novel instrument to quantify organ damage in systemic sclerosis,” by Ferdowsi N, *et al.*, 2019, *Ann Rheum Dis*, 78(6), Supplementary File. Copyright statement. Missing data of ASCS and CSRG cohorts have been excluded.

**Table S2. Clinical characteristics at baseline of SCTC-DI low-burden (< 6) and high-burden (≥ 6) group**

| Characteristics                       | Low-burden<br>N = 273 | High-burden<br>N = 160 | <i>p</i> value |
|---------------------------------------|-----------------------|------------------------|----------------|
| Age at initial visit (years)          | 49.8 ± 15.3           | 55.8 ± 12.0            | < 0.001        |
| Sex, female                           | 229 (83.9%)           | 144 (90.0%)            | 0.075          |
| Disease duration (years)              | 7.1 ± 9.0             | 10.0 ± 10.1            | 0.003          |
| Disease classification                |                       |                        |                |
| lcSSc                                 | 103 (37.7%)           | 70 (43.8%)             | 0.217          |
| dcSSc                                 | 118 (43.2%)           | 59 (36.9%)             | 0.195          |
| Sine scleroderma                      | 10 (3.7%)             | 3 (1.9%)               | 0.447          |
| Overlap syndrome                      | 42 (15.4%)            | 28 (17.5%)             | 0.564          |
| RA                                    | 21 (7.7%)             | 6 (3.8%)               | 0.102          |
| SLE                                   | 17 (6.2%)             | 12 (7.5%)              | 0.609          |
| DM/PM                                 | 4 (1.5%)              | 10 (6.3%)              | 0.007          |
| Laboratory parameters                 |                       |                        |                |
| Anemia                                | 86 (31.5%)            | 89 (55.6%)             | < 0.001        |
| High ESR                              | 83/255 (32.5%)        | 73/154 (47.4%)         | 0.003          |
| High CRP                              | 50/253 (20.6%)        | 35/150 (23.3%)         | 0.519          |
| Hypocomplementemia                    | 102/174 (42.5%)       | 74/79 (49.0%)          | 0.208          |
| Autoantibody profile                  |                       |                        |                |
| ANA                                   | 193 (70.7%)           | 119 (74.4%)            | 0.410          |
| Anti-topoisomerase I<br>(Anti-Scl-70) | 75 (27.5%)            | 54 (33.8%)             | 0.168          |
| Anti-centromere proteins              | 40 (14.7%)            | 16 (10.0%)             | 0.164          |
| Medication                            |                       |                        |                |
| Steroids                              | 108 (39.6%)           | 83 (51.9%)             | 0.013          |
| Immunosuppressants                    | 103 (37.7%)           | 62 (38.8%)             | 0.833          |

N = 273 in anemia group and N = 160 in non-anemia group if not specified.

Abbreviations: SCTC-DI, Scleroderma Clinical Trials Consortium Damage Index; lcSSc, limited cutaneous systemic sclerosis; dcSSc, diffused cutaneous systemic sclerosis; RA, rheumatoid arthritis; SLE, systemic lupus erythematosus; DM, dermatomyositis; PM, polymyositis; ESR, erythrocyte sedimentation rate; CRP: C-reactive protein; ANA, anti-nuclear antibody.

**Table S3. Clinical characteristics of  
SCTC-DI modified low-burden (< 4) and high-burden (≥ 4) group**

| Characteristics                       | Low-burden N = 175 | High-burden N = 258 | <i>p</i> value |
|---------------------------------------|--------------------|---------------------|----------------|
| Age at initial visit (years)          | 49.9 ± 15.4        | 53.5 ± 13.6         | 0.012          |
| Sex, female                           | 143 (81.7%)        | 230 (89.1%)         | 0.028          |
| Disease duration (years)              | 5.7 ± 8.5          | 9.9 ± 9.8           | <0.001         |
| Disease classification                |                    |                     |                |
| lcSSc                                 | 69 (39.4%)         | 104 (40.3%)         | 0.854          |
| dcSSc                                 | 75 (42.9%)         | 102 (39.5%)         | 0.490          |
| Sine scleroderma                      | 5 (2.9%)           | 8 (3.1%)            | 0.884          |
| Overlap syndrome                      | 26 (14.9%)         | 44 (17.1%)          | 0.542          |
| RA                                    | 16 (9.1%)          | 11 (4.3%)           | 0.039          |
| SLE                                   | 8 (4.6%)           | 21 (8.1%)           | 0.145          |
| DM/PM                                 | 2 (1.1%)           | 12 (4.7%)           | 0.043          |
| Laboratory parameters                 |                    |                     |                |
| Anemia                                | 52 (29.7%)         | 123 (47.7%)         | < 0.001        |
| High ESR                              | 50/166 (30.1%)     | 106/243 (43.6%)     | 0.006          |
| High CRP                              | 30/154 (19.5%)     | 55/239 (23.0%)      | 0.406          |
| Hypocomplementemia                    | 69/156 (44.2%)     | 107/235 (45.5%)     | 0.800          |
| Autoantibody profile                  |                    |                     |                |
| ANA                                   | 121 (69.1%)        | 191 (74.0%)         | 0.266          |
| Anti-topoisomerase 1<br>(Anti-Scl-70) | 44 (25.1%)         | 85 (32.9%)          | 0.081          |
| Anti-centromere proteins              | 23 (13.1%)         | 33 (12.8%)          | 0.915          |
| Medication                            |                    |                     |                |
| Steroids                              | 69 (39.4%)         | 122 (47.3%)         | 0.106          |
| Immunosuppressants                    | 66 (37.7%)         | 99 (38.4%)          | 0.890          |

N = 175 in low-burden group and N = 258 in high-burden group if not specified.

Abbreviations: SCTC-DI, Scleroderma Clinical Trials Consortium Damage Index; lcSSc, limited cutaneous systemic sclerosis; dcSSc, diffused cutaneous systemic sclerosis; RA, rheumatoid arthritis; SLE, systemic lupus erythematosus; DM, dermatomyositis; PM, polymyositis; ESR, erythrocyte sedimentation rate; CRP: C-reactive protein; ANA, anti-nuclear antibody.

**Table S4. Frequency of SCTC-DI items in SSc patients during follow-up (N = 207)**

| Items                                                                   | Baseline assessment                 | Follow-up assessment                | Progression |
|-------------------------------------------------------------------------|-------------------------------------|-------------------------------------|-------------|
| Musculoskeletal and skin                                                | 106 (51.2%), Score: $1.78 \pm 2.03$ | 125 (60.4%), Score: $1.03 \pm 1.99$ | 22 (10.6%)  |
| Joint contracture (small joints)                                        | 26 (12.6%)                          | 35 (16.9%)                          | 9 (4.3%)    |
| Joint contracture (large joints)                                        | 2 (1.0%)                            | 3 (1.4%)                            | 1 (0.4%)    |
| Sicca symptoms                                                          | 87 (42.0%)                          | 95 (45.9%)                          | 8 (3.8%)    |
| Proximal muscle weakness                                                | 13 (6.3%)                           | 16 (7.7%)                           | 3 (1.4%)    |
| Calcinosis complicated by infection or requiring surgery                | 3 (1.4%)                            | 3 (1.4%)                            | 0 (0.0%)    |
| Vascular                                                                | 36 (17.4%), Score: $0.36 \pm 0.79$  | 46 (22.2%), Score: $0.46 \pm 0.88$  | 11 (5.3%)   |
| Digital ulceration                                                      | 36 (17.4%)                          | 46 (22.2%)                          | 10 (4.8%)   |
| Digital amputation required                                             | 2 (1.0%)                            | 4 (1.9%)                            | 2 (0.9%)    |
| Gastrointestinal                                                        | 100 (48.3%), Score: $0.99 \pm 1.22$ | 126 (60.9%), Score: $1.28 \pm 1.33$ | 41 (19.8%)  |
| Esophageal dysmotility                                                  | 32 (15.5%)                          | 38 (18.4%)                          | 6 (2.9%)    |
| Esophageal stricture                                                    | 2 (1.0%)                            | 2 (1.0%)                            | 0 (0.0%)    |
| Refractory gastro-esophageal reflux disease (heartburn)                 | 45 (21.7%)                          | 68 (32.9%)                          | 23 (11.1%)  |
| GAVE                                                                    | 0 (0.0%)                            | 0 (0.0%)                            | 0 (0.0%)    |
| Pseudo-obstruction                                                      | 1 (0.5%)                            | 2 (1.0%)                            | 1 (0.4%)    |
| BMI < 18.5 kg/m <sup>2</sup> or weight loss > 10% in the last 12 months | 61 (29.5%)                          | 75 (36.2%)                          | 14 (6.7%)   |
| Respiratory                                                             | 86 (41.5%), Score: $1.34 \pm 2.17$  | 117 (56.5%), Score: $1.97 \pm 2.53$ | 39 (18.8%)  |
| ILD > 20% extent on HRCT                                                | 84 (40.6%)                          | 117 (56.5%)                         | 33 (15.9%)  |
| FVC < 70%                                                               | 21 (10.1%)                          | 35 (16.9%)                          | 14 (6.7%)   |
| Dependence on home oxygen                                               | 5 (2.4%)                            | 7 (3.4%)                            | 2 (0.9%)    |
| Cardiovascular                                                          | 19 (9.2%), Score: $0.25 \pm 0.98$   | 28 (13.5%), Score: $0.44 \pm 1.37$  | 14 (6.8%)   |
| PAH                                                                     | 13 (6.3%)                           | 23 (11.1%)                          | 10 (4.8%)   |
| Moderate to severe right ventricular dysfunction                        | 1 (0.5%)                            | 2 (1.0%)                            | 1 (0.4%)    |
| Myocardial disease                                                      | 5 (2.4%)                            | 10 (4.8%)                           | 5 (2.4%)    |
| Moderate to large pericardial effusion                                  | 5 (2.4%)                            | 5 (2.4%)                            | 0 (0.0%)    |
| Renal                                                                   | 0 (0.0%), Score: $0.00 \pm 0.00$    | 3 (1.4%), Score: $0.06 \pm 0.54$    | 3 (1.4%)    |
| History of SRC                                                          | 0 (0.0%)                            | 3 (1.4%)                            | 3 (1.4%)    |
| eGFR < 45 ml/min/1.73m <sup>2</sup>                                     | 0 (0.0%)                            | 2 (1.0%)                            | 2 (0.9%)    |
| CKD stage 5 and need for renal replacement therapy                      | 0 (0.0%)                            | 1 (0.5%)                            | 1 (0.4%)    |
| SCTC-DI                                                                 | $4.71 \pm 3.98$                     | $6.24 \pm 4.46$                     | /           |
| SCTC-DI = 0                                                             | 34 (16.4%)                          | 13 (6.3%)                           | /           |
| ΔSCTC-DI ≥ 1 (Follow-up)                                                | /                                   | /                                   | 100 (48.3%) |

Abbreviations: SCTC-DI, Scleroderma Clinical Trials Consortium Damage Index; SSc: systemic sclerosis; GAVE, Gastric antral vascular ectasia; BMI, body mass index; ILD, interstitial lung disease; HRCT, HRCT, high-resolution CT; FVC, Forced Vital Capacity; PAH, pulmonary arterial hypertension; SRC, scleroderma renal crisis; eGFR, Estimated Glomerular Filtration Rate; CKD, chronic kidney disease.

**Table S5. Univariate Cox regression analysis of the organ damage progression based on SCTC-DI (N = 207)**

| Baseline Characteristics         | Univariate analysis |                | Multivariate analysis |                |
|----------------------------------|---------------------|----------------|-----------------------|----------------|
|                                  | HR (95% CI)         | <i>p</i> value | HR (95% CI)           | <i>p</i> value |
| Age ≥ 60 years                   | 0.87 (0.55, 1.35)   | 0.524          |                       |                |
| Sex (female)                     | 0.86 (0.48, 1.54)   | 0.612          |                       |                |
| Duration ≥ 2 years               | 0.77 (0.52, 1.16)   | 0.209          |                       |                |
| Classification                   |                     |                |                       |                |
| lcSSc                            | 0.68 (0.43, 1.07)   | 0.094          |                       |                |
| dcSSc                            | 1.11 (0.75, 1.65)   | 0.615          |                       |                |
| Sine scleroderma                 | 0.93 (0.13, 6.65)   | 0.939          |                       |                |
| Overlap                          | 1.34 (0.87, 2.08)   | 0.189          |                       |                |
| RA                               | 1.47 (0.82, 2.63)   | 0.199          |                       |                |
| SLE                              | 1.27 (0.70, 2.33)   | 0.435          |                       |                |
| DM/PM                            | 0.84 (0.27, 2.65)   | 0.765          |                       |                |
| Anemia                           | 1.59 (1.07, 2.36)   | 0.022          | 1.75 (1.16, 2.66)     | 0.008          |
| High ESR (n = 192)               | 1.54 (1.03, 2.31)   | 0.036          |                       |                |
| High CRP (n = 190)               | 1.74 (1.12, 2.69)   | 0.014          |                       |                |
| Hypocomplementemia (n= 190)      | 1.33 (0.88, 2.00)   | 0.175          |                       |                |
| Autoantibody profile             |                     |                |                       |                |
| ANA                              | 1.03 (0.66, 1.62)   | 0.894          |                       |                |
| Anti-Scl70                       | 1.53 (1.00, 2.34)   | 0.048          | 1.91 (1.22, 2.99)     | 0.005          |
| Anti-centromere proteins         | 0.61 (0.31, 1.17)   | 0.133          |                       |                |
| Medicine usage                   |                     |                |                       |                |
| Initial steroids                 | 1.09 (0.73, 1.63)   | 0.687          |                       |                |
| Initial Immunosuppressants       | 0.77 (0.50, 1.18)   | 0.232          |                       |                |
| Follow-up steroids               | 1.72 (0.99, 2.99)   | 0.053          |                       |                |
| Follow-up Immunosuppressants     | 0.95 (0.63, 1.44)   | 0.816          |                       |                |
| SCTC-DI damage burden at initial |                     |                |                       |                |
| High burden ( ≥ 6)               | 0.80 (0.51, 1.25)   | 0.325          |                       |                |
| Modified high burden ( ≥ 4)      | 0.82 (0.55, 1.21)   | 0.311          |                       |                |

N = 207 if not specified.

Abbreviations: SCTC-DI, Scleroderma Clinical Trials Consortium Damage Index; lcSSc, limited cutaneous systemic sclerosis; dcSSc, diffused cutaneous systemic sclerosis; RA, rheumatoid arthritis; SLE, systemic lupus erythematosus; DM, dermatomyositis; PM, polymyositis; ESR, erythrocyte sedimentation rate; CRP: C-reactive protein; ANA, anti-nuclear antibody.

**Table S6. Organ damage incident in different organ systems in SSc patients with and without anemia.**

| <b>Organ systems</b>     | <b>Anemia<br/>N=175</b> | <b>Non-anemia<br/>N=258</b> | <b><i>p</i> value</b> |
|--------------------------|-------------------------|-----------------------------|-----------------------|
| Musculoskeletal and skin | 106 (60.6%)             | 102 (39.5%)                 | < 0.001               |
| Vascular                 | 36 (20.6%)              | 51 (19.8%)                  | 0.838                 |
| Gastrointestinal         | 109 (62.3%)             | 115 (44.6%)                 | < 0.001               |
| Respiratory              | 76 (43.4%)              | 100 (38.8%)                 | 0.332                 |
| Cardiovascular           | 29 (16.6%)              | 26 (10.1%)                  | 0.046                 |
| Renal                    | 6 (3.4%)                | 0 (0.0%)                    | 0.010                 |
| SCTC-DI = 0              | 17 (9.7%)               | 51 (19.8%)                  | 0.005                 |

Abbreviations: SSc, systemic sclerosis; SCTC-DI, Scleroderma Clinical Trials Consortium Damage Index.

**Table S7. Organ damage progression incident in different organ systems in SSc patients with and without anemia**

| <b>Organ Systems</b>      | <b>Anemia<br/>N=83</b> | <b>Non-anemia<br/>N=124</b> | <b><i>p</i> value</b> |
|---------------------------|------------------------|-----------------------------|-----------------------|
| Musculoskeletal and skin  | 7 (8.4%)               | 15 (12.1%)                  | 0.402                 |
| Vascular                  | 3 (3.6%)               | 8 (6.5%)                    | 0.565                 |
| Gastrointestinal          | 21 (25.3%)             | 20 (16.1%)                  | 0.105                 |
| Respiratory               | 20 (24.1%)             | 19 (15.3%)                  | 0.114                 |
| Cardiovascular            | 10 (12.0%)             | 4 (3.2%)                    | 0.013                 |
| Renal                     | 3 (3.6%)               | 0 (0.0%)                    | 0.033                 |
| $\Delta$ SCTC-DI $\geq 1$ | 50 (60.2%)             | 50 (40.3%)                  | 0.005                 |

Abbreviations: SSc, systemic sclerosis; SCTC-DI, Scleroderma Clinical Trials Consortium Damage Index.



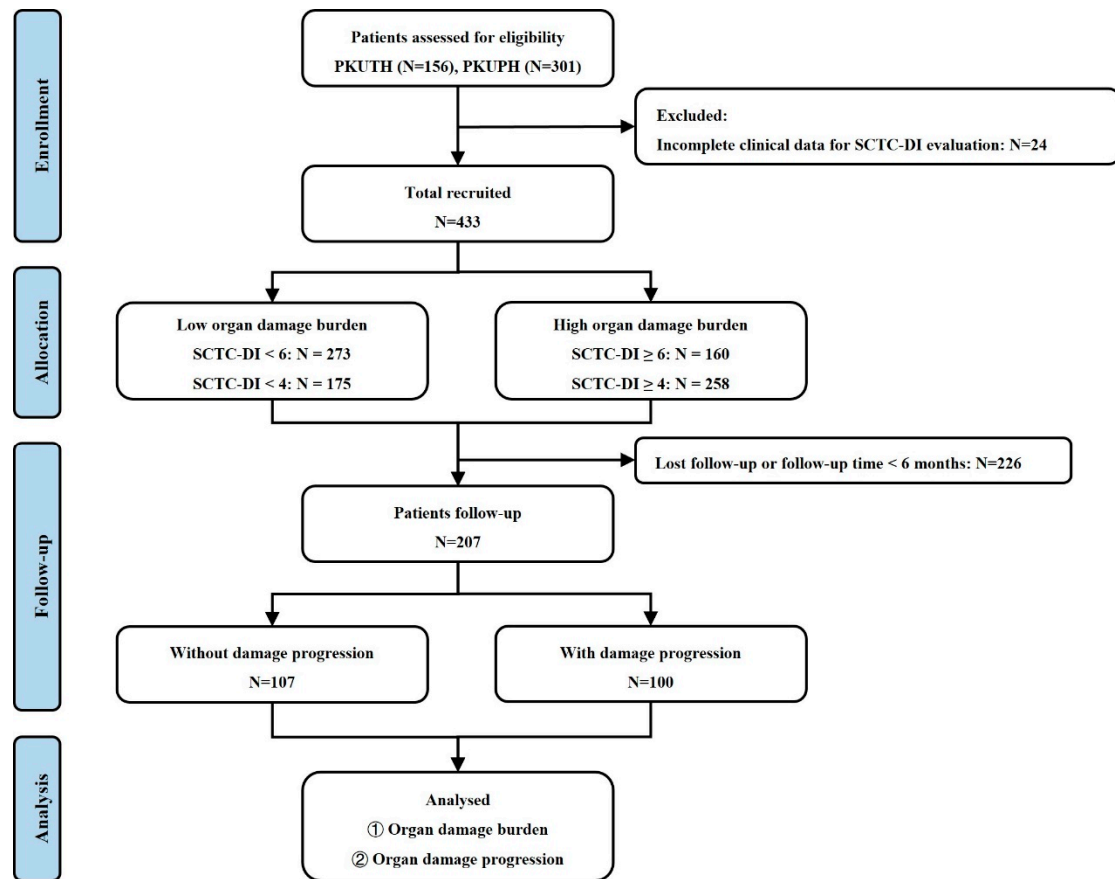

**Figure S1. Study diagram.** A simple study flow diagram of our study.
